# Supplementary material
Source: PubMed Central journal article supplement (PMC6349542)
Supplement: NIHMS1002550-supplement-ESI.pdf [file NIHMS1002550-supplement-ESI.pdf]

Supplementary Information for

**Dual Cationic-Anionic Profiling of Metabolites in a Single Embryonic Cell in a Live *Xenopus laevis* Embryo by Microprobe CE-ESI-MS**

Erika P. Portero and Peter Nemes\*

Department of Chemistry & Biochemistry,  
University of Maryland, College Park, MD 20742

\***Correspondence to:** Peter Nemes, Department of Chemistry & Biochemistry, University of Maryland, 8051 Regents Drive, College Park, MD 20742, USA. Phone: (1) 301-405-0373.  
E-mail: [nemes@umd.edu](mailto:nemes@umd.edu)

**Table of Contents**

|                |   |
|----------------|---|
| Table S1 ..... | 2 |
| Table S2 ..... | 4 |
| Table S3 ..... | 6 |
| Table S4 ..... | 7 |

## TABLES

**Table S1.** Molecular features detected by anionic analysis. Identified features are highlighted.  
Key:  $t_m$ , migration time.

| $m/z$           | $t_m$ (min) | $m/z$           | $t_m$ (min) | $m/z$           | $t_m$ (min) |
|-----------------|-------------|-----------------|-------------|-----------------|-------------|
| <b>173.1027</b> | <b>11.3</b> | 343.8039        | 20.3        | 261.1350        | 29.6        |
| <b>145.0957</b> | <b>13.9</b> | <b>168.0413</b> | <b>20.5</b> | 257.1761        | 29.7        |
| 213.1135        | 14.4        | 126.0041        | 20.7        | 270.1717        | 29.7        |
| 211.0593        | 14.9        | 150.0570        | 20.8        | 364.1125        | 29.8        |
| 195.0857        | 15.0        | 164.0006        | 20.8        | 304.1518        | 29.8        |
| <b>145.0605</b> | <b>15.1</b> | <b>166.0519</b> | <b>20.8</b> | 348.1424        | 29.8        |
| 180.0331        | 15.8        | 114.9363        | 21.2        | 225.1499        | 29.8        |
| 194.0430        | 16.3        | 160.0599        | 21.7        | 264.1585        | 29.8        |
| <b>179.0555</b> | <b>16.4</b> | 173.1060        | 22.7        | 280.1324        | 29.8        |
| 185.9915        | 16.5        | 154.0614        | 23.2        | 293.1781        | 29.9        |
| 199.9901        | 16.5        | 112.9854        | 24.7        | 244.1559        | 30.3        |
| 242.0362        | 16.5        | <b>132.0286</b> | <b>24.8</b> | 211.1346        | 30.5        |
| 273.1059        | 16.5        | 331.5562        | 25.8        | 258.1714        | 30.9        |
| 172.0222        | 16.8        | 291.9683        | 25.8        | 294.1393        | 31.0        |
| 314.8748        | 17.3        | 152.0108        | 26.5        | 328.0466        | 31.2        |
| 204.0888        | 17.5        | 242.1145        | 26.6        | 214.1457        | 31.2        |
| <b>130.0613</b> | <b>17.6</b> | 78.9598         | 26.7        | <b>105.0191</b> | <b>31.3</b> |
| 170.0429        | 17.6        | 182.0581        | 26.7        | 209.1554        | 31.3        |
| 186.0166        | 17.7        | 96.9695         | 26.8        | 227.1269        | 31.4        |
| 192.0509        | 17.7        | 136.9618        | 26.8        | 245.0436        | 31.7        |
| 188.0169        | 17.9        | 156.9821        | 27.2        | 250.1466        | 31.7        |
| 183.0162        | 18.0        | 144.9751        | 27.3        | 363.0204        | 31.8        |
| 229.0413        | 18.0        | 238.9463        | 27.5        | 122.9933        | 31.8        |
| 223.0096        | 18.1        | 387.1692        | 27.9        | 199.1714        | 31.9        |
| 315.9317        | 18.2        | <b>140.0115</b> | <b>28.2</b> | <b>150.0415</b> | <b>31.9</b> |
| 116.0725        | 18.2        | 253.2161        | 28.4        | 233.1551        | 31.9        |
| 153.0272        | 18.3        | 180.0036        | 28.5        | 302.0854        | 31.9        |
| 190.0351        | 18.3        | 195.9774        | 28.5        | <b>218.1044</b> | <b>32.0</b> |
| 140.0112        | 18.5        | 299.9044        | 28.5        | 240.0860        | 32.0        |
| 169.0002        | 18.5        | 161.9930        | 28.6        | 262.0677        | 32.0        |
| 193.0701        | 18.5        | 201.9858        | 28.7        | 280.0777        | 32.0        |
| <b>131.0461</b> | <b>18.6</b> | 288.1824        | 28.8        | 324.0685        | 32.0        |
| 249.0243        | 18.6        | 272.1873        | 29.0        | 362.0244        | 32.0        |
| 138.0555        | 18.8        | 308.0998        | 29.2        | 274.0617        | 32.1        |
| 100.0410        | 19.0        | 256.1923        | 29.2        | 278.0417        | 32.1        |
| 214.0492        | 19.1        | 237.0919        | 29.3        | 340.0410        | 32.1        |
| 124.0068        | 19.1        | 254.1767        | 29.5        | 346.0513        | 32.1        |
| <b>400.1150</b> | <b>19.9</b> | 312.0709        | 29.6        | 146.0832        | 32.1        |

| <i>m/z</i>      | <i>t<sub>m</sub></i> (min) | <i>m/z</i>      | <i>t<sub>m</sub></i> (min) | <i>m/z</i>      | <i>t<sub>m</sub></i> (min) |
|-----------------|----------------------------|-----------------|----------------------------|-----------------|----------------------------|
| 200.1303        | 32.2                       | 179.0751        | 39.3                       | 290.9664        | 49.7                       |
| 349.0044        | 32.2                       | <b>182.0472</b> | <b>39.7</b>                | 171.0125        | 50.5                       |
| 243.0813        | 32.4                       | 138.9780        | 39.8                       | 213.9731        | 50.8                       |
| 185.1554        | 32.6                       | 199.0001        | 39.9                       | 234.1102        | 50.9                       |
| 144.0310        | 32.8                       | 176.9354        | 40.0                       | 173.0040        | 51.0                       |
| 275.1325        | 32.8                       | 296.9767        | 40.1                       | 121.0305        | 51.1                       |
| 216.0885        | 32.9                       | 131.0724        | 40.2                       | <b>210.0276</b> | <b>53.4</b>                |
| 125.0981        | 33.2                       | <b>146.0472</b> | <b>40.4</b>                | 232.0090        | 53.4                       |
| 186.1146        | 33.2                       | 149.0470        | 40.5                       | 112.0511        | 53.5                       |
| 221.0824        | 33.3                       | 362.0071        | 40.9                       | 120.9804        | 53.5                       |
| 321.0455        | 33.4                       | 380.0180        | 40.9                       | <b>88.0405</b>  | <b>53.6</b>                |
| 172.1431        | 33.5                       | 176.9372        | 40.9                       | 102.9703        | 53.6                       |
| 217.9959        | 33.8                       | <b>323.0301</b> | <b>40.9</b>                | 166.9735        | 53.6                       |
| 251.0712        | 34.0                       | 282.0396        | 40.9                       | 271.9400        | 53.6                       |
| 236.0980        | 34.1                       | 272.9581        | 41.0                       | 285.9386        | 53.6                       |
| 285.0446        | 34.1                       | 132.0420        | 41.0                       | 192.0174        | 53.7                       |
| 149.1341        | 34.3                       | 213.0235        | 41.0                       | 247.9830        | 53.7                       |
| 172.0999        | 34.5                       | 267.5315        | 42.4                       | 269.9646        | 53.7                       |
| 175.0229        | 34.5                       | 282.0214        | 43.0                       | <b>130.0613</b> | <b>53.9</b>                |
| 157.2450        | 34.8                       | 111.0211        | 43.1                       | 103.0760        | 55.2                       |
| 159.1295        | 34.9                       | 241.0127        | 43.1                       | 192.9881        | 55.3                       |
| 190.0551        | 35.2                       | 283.0236        | 43.1                       | 208.9613        | 55.3                       |
| 177.0928        | 35.6                       | 117.0565        | 44.4                       | 248.9531        | 55.5                       |
| 248.0784        | 35.6                       | 229.0107        | 44.5                       | 135.0131        | 57.3                       |
| 127.0265        | 36.0                       | 231.0182        | 45.3                       | 105.0205        | 57.8                       |
| 143.1086        | 36.5                       | 207.0131        | 45.4                       | 115.0761        | 60.8                       |
| 181.0517        | 36.5                       | <b>135.0311</b> | <b>45.4</b>                | 100.9857        | 61.3                       |
| 193.0913        | 37.1                       | 197.0312        | 45.4                       | 188.9389        | 61.3                       |
| 171.0057        | 38.2                       | 298.9435        | 46.3                       | 200.9415        | 61.3                       |
| 289.0316        | 38.3                       | 271.4403        | 47.3                       | 225.1867        | 61.3                       |
| <b>322.0462</b> | <b>38.4</b>                | 110.0358        | 47.4                       | 239.2023        | 61.4                       |
| 290.0891        | 38.5                       | 131.0727        | 47.7                       | <b>259.0234</b> | <b>62.0</b>                |
| 129.0930        | 38.5                       | 150.0176        | 47.7                       | 130.0617        | 66.1                       |
| <b>134.0482</b> | <b>38.7</b>                | 128.0364        | 47.8                       |                 |                            |
| 165.0414        | 38.7                       | 119.0360        | 48.0                       |                 |                            |

**Table S2.** Metabolites identified by cationic microprobe CE-ESI-MS. Key to symbols is in the footnote of **Table S3**.

| <b>ID</b> | <b>Metabolite</b>                                   | <b>Formula</b>                                                  | <b>Time (min)</b> | <b>m/z measured</b> | <b>m/z theoretical</b> | <b><math>\Delta m/z</math> (mDa)</b> | <b><math>\Delta m/z</math> (ppm)</b> |
|-----------|-----------------------------------------------------|-----------------------------------------------------------------|-------------------|---------------------|------------------------|--------------------------------------|--------------------------------------|
| <b>1</b>  | Spermidine (SPM) <sup>**,R1</sup>                   | C <sub>7</sub> H <sub>19</sub> N <sub>3</sub>                   | 15.5              | 146.1663            | 146.1652               | -1.1                                 | -7.5                                 |
| <b>2</b>  | Thiamine <sup>**,R1</sup>                           | C <sub>12</sub> H <sub>16</sub> N <sub>4</sub> OS               | 17.8              | 265.1114            | 265.1118               | 0.4                                  | 1.4                                  |
| <b>3</b>  | Choline (Cho) <sup>**,R1</sup>                      | C <sub>5</sub> H <sub>13</sub> NO                               | 18.6              | 104.1068            | 104.1070               | 0.2                                  | 1.9                                  |
| <b>4</b>  | Arg-Ala (RA) <sup>**,R1</sup>                       | C <sub>9</sub> H <sub>19</sub> N <sub>5</sub> O <sub>3</sub>    | 19.3              | 246.1570            | 246.1561               | -0.9                                 | -3.8                                 |
| <b>5</b>  | Lys-Ser (KS) <sup>**,R1</sup>                       | C <sub>9</sub> H <sub>19</sub> N <sub>3</sub> O <sub>4</sub>    | 19.3              | 234.1434            | 234.1448               | 1.4                                  | 6.1                                  |
| <b>6</b>  | Val-Lys (VK) <sup>**,R2</sup>                       | C <sub>11</sub> H <sub>23</sub> N <sub>3</sub> O <sub>3</sub>   | 19.6              | 246.1805            | 246.1812               | 0.7                                  | 2.9                                  |
| <b>7</b>  | S-adenosyl-methionine (SAM) <sup>**,R1</sup>        | C <sub>15</sub> H <sub>22</sub> N <sub>6</sub> O <sub>5</sub> S | 19.6              | 399.1430            | 399.1445               | 1.5                                  | 3.8                                  |
| <b>8</b>  | Ser-Arg (SR) <sup>**,R1</sup>                       | C <sub>9</sub> H <sub>19</sub> N <sub>5</sub> O <sub>4</sub>    | 19.6              | 262.1511            | 262.1510               | -0.1                                 | -0.4                                 |
| <b>9</b>  | Ornithine (Orn) <sup>**,R1</sup>                    | C <sub>5</sub> H <sub>12</sub> N <sub>2</sub> O <sub>2</sub>    | 19.8              | 133.0973            | 133.0972               | -0.1                                 | -0.8                                 |
| <b>10</b> | Lysine (Lys) <sup>**,R1</sup>                       | C <sub>6</sub> H <sub>14</sub> N <sub>2</sub> O <sub>2</sub>    | 20.0              | 147.1132            | 147.1128               | -0.4                                 | -2.7                                 |
| <b>11</b> | Arginine (Arg) <sup>**,R1</sup>                     | C <sub>6</sub> H <sub>14</sub> N <sub>4</sub> O <sub>2</sub>    | 20.4              | 175.1193            | 175.1190               | -0.3                                 | -2.0                                 |
| <b>12</b> | Homolysine <sup>**,R1</sup>                         | C <sub>7</sub> H <sub>16</sub> N <sub>2</sub> O <sub>2</sub>    | 20.4              | 161.1287            | 161.1285               | -0.2                                 | -1.5                                 |
| <b>13</b> | Tyr-Lys (YK) <sup>**,R2</sup>                       | C <sub>15</sub> H <sub>23</sub> N <sub>3</sub> O <sub>4</sub>   | 20.4              | 310.1749            | 310.1761               | 1.2                                  | 4.0                                  |
| <b>14</b> | $\gamma$ -aminobutyric acid (GABA) <sup>**,R2</sup> | C <sub>4</sub> H <sub>9</sub> NO <sub>2</sub>                   | 20.5              | 104.0707            | 104.0706               | -0.1                                 | -0.9                                 |
| <b>15</b> | N6,N6,N6-trimethyl-lysine (TML) <sup>**,R1</sup>    | C <sub>9</sub> H <sub>20</sub> N <sub>2</sub> O <sub>2</sub>    | 20.5              | 189.1599            | 189.1598               | -0.1                                 | -0.8                                 |
| <b>16</b> | Histidine (His) <sup>**,R1</sup>                    | C <sub>6</sub> H <sub>9</sub> N <sub>3</sub> O <sub>2</sub>     | 20.5              | 156.0774            | 156.0768               | -0.6                                 | -4.1                                 |
| <b>17</b> | Methylhistidine <sup>**</sup>                       | C <sub>7</sub> H <sub>11</sub> N <sub>3</sub> O <sub>2</sub>    | 20.7              | 170.0928            | 170.0924               | -0.4                                 | -2.3                                 |
| <b>18</b> | Guanidinopropanoate <sup>**</sup>                   | C <sub>4</sub> H <sub>9</sub> N <sub>3</sub> O <sub>2</sub>     | 20.8              | 132.0761            | 132.0768               | 0.7                                  | 4.9                                  |
| <b>19</b> | Acetylcholine (AcCho) <sup>**,R1</sup>              | C <sub>7</sub> H <sub>15</sub> NO <sub>2</sub>                  | 20.8              | 146.1177            | 146.1176               | -0.1                                 | -1.0                                 |
| <b>20</b> | Leu-Ala (LA) <sup>**,R2</sup>                       | C <sub>9</sub> H <sub>18</sub> N <sub>2</sub> O <sub>3</sub>    | 22.0              | 203.1388            | 203.1390               | 0.2                                  | 1.1                                  |
| <b>21</b> | Cis-urocanate (cURA) <sup>**,R1</sup>               | C <sub>6</sub> H <sub>6</sub> N <sub>2</sub> O <sub>2</sub>     | 22.2              | 139.0500            | 139.0502               | 0.2                                  | 1.4                                  |
| <b>22</b> | Guanine <sup>**,R1</sup>                            | C <sub>5</sub> H <sub>5</sub> N <sub>5</sub> O                  | 22.3              | 152.0572            | 152.0567               | -0.5                                 | -3.4                                 |
| <b>23</b> | Carnitine (Car) <sup>**,R1</sup>                    | C <sub>7</sub> H <sub>15</sub> NO <sub>3</sub>                  | 22.8              | 162.1131            | 162.1125               | -0.6                                 | -3.9                                 |
| <b>24</b> | Trans-urocanate (tURA) <sup>**,R1</sup>             | C <sub>6</sub> H <sub>6</sub> N <sub>2</sub> O <sub>2</sub>     | 23.0              | 139.0500            | 139.0502               | 0.2                                  | 1.4                                  |
| <b>25</b> | Methylguanine <sup>**,R2</sup>                      | C <sub>6</sub> H <sub>7</sub> N <sub>5</sub> O                  | 23.3              | 166.0726            | 166.0723               | -0.3                                 | -1.8                                 |
| <b>26</b> | Pyridoxal <sup>**</sup>                             | C <sub>8</sub> H <sub>9</sub> NO <sub>3</sub>                   | 23.4              | 168.0659            | 168.0655               | -0.4                                 | -2.3                                 |
| <b>27</b> | Acetylcarnitine (AcCar) <sup>**,R1</sup>            | C <sub>9</sub> H <sub>17</sub> NO <sub>4</sub>                  | 24.5              | 204.1231            | 204.1230               | -0.1                                 | -0.3                                 |
| <b>28</b> | Methylaspartate <sup>**,R2</sup>                    | C <sub>5</sub> H <sub>9</sub> NO <sub>4</sub>                   | 25.4              | 148.0605            | 148.0604               | -0.1                                 | -0.4                                 |
| <b>29</b> | Glycine <sup>*,R2</sup>                             | C <sub>2</sub> H <sub>5</sub> NO <sub>2</sub>                   | 25.3              | 76.0386             | 76.0393                | 0.7                                  | 9.3                                  |
| <b>30</b> | Niacinamide <sup>*,R2</sup>                         | C <sub>6</sub> H <sub>6</sub> N <sub>2</sub> O                  | 25.4              | 123.0549            | 123.0553               | 0.4                                  | 3.2                                  |

| ID        | Metabolite                                    | Formula                                                                       | Time (min) | m/z measured | m/z theoretical | $\Delta m/z$ (mDa) | $\Delta m/z$ (ppm) |
|-----------|-----------------------------------------------|-------------------------------------------------------------------------------|------------|--------------|-----------------|--------------------|--------------------|
| <b>31</b> | Creatine (CR) <sup>*,**,R1</sup>              | C <sub>4</sub> H <sub>9</sub> N <sub>3</sub> O <sub>2</sub>                   | 25.6       | 132.0779     | 132.0768        | -1.1               | -8.7               |
| <b>32</b> | Pro-Val (PV) <sup>**,R2</sup>                 | C <sub>10</sub> H <sub>18</sub> N <sub>2</sub> O <sub>3</sub>                 | 25.8       | 215.1378     | 215.1390        | 1.2                | 5.7                |
| <b>33</b> | Alanine (Ala) <sup>*,R1</sup>                 | C <sub>3</sub> H <sub>7</sub> NO <sub>2</sub>                                 | 27.4       | 90.0548      | 90.0550         | 0.2                | 1.7                |
| <b>34</b> | Argininosuccinate (ASA) <sup>**</sup>         | C <sub>10</sub> H <sub>18</sub> N <sub>4</sub> O <sub>6</sub>                 | 28.5       | 291.1292     | 291.1299        | 0.7                | 2.4                |
| <b>35</b> | Valine (Val) <sup>*,**,R1</sup>               | C <sub>5</sub> H <sub>11</sub> NO <sub>2</sub>                                | 30.5       | 118.0864     | 118.0863        | -0.1               | -1.2               |
| <b>36</b> | Serine (Ser) <sup>*,**,R1</sup>               | C <sub>3</sub> H <sub>7</sub> NO <sub>3</sub>                                 | 30.6       | 106.0498     | 106.0499        | 0.1                | 0.7                |
| <b>37</b> | Isoleucine <sup>*,‡,R1</sup>                  | C <sub>6</sub> H <sub>13</sub> NO <sub>2</sub>                                | 30.7       | 132.1023     | 132.1019        | -0.4               | -3.0               |
| <b>38</b> | Leucine <sup>*,‡,R1</sup>                     | C <sub>6</sub> H <sub>13</sub> NO <sub>2</sub>                                | 31.0       | 132.1023     | 132.1019        | -0.4               | -3.0               |
| <b>39</b> | Asparagine (Asn) <sup>**</sup>                | C <sub>4</sub> H <sub>8</sub> N <sub>2</sub> O <sub>3</sub>                   | 32.1       | 133.0610     | 133.0608        | -0.2               | -1.7               |
| <b>40</b> | Threonine (Thr) <sup>*,**,R1</sup>            | C <sub>4</sub> H <sub>9</sub> NO <sub>3</sub>                                 | 32.1       | 120.0654     | 120.0655        | 0.1                | 1.0                |
| <b>41</b> | Tryptophan (Trp) <sup>*,**,R1</sup>           | C <sub>11</sub> H <sub>12</sub> N <sub>2</sub> O <sub>2</sub>                 | 32.6       | 205.0967     | 205.0972        | 0.5                | 2.2                |
| <b>42</b> | Methionine (Met) <sup>*,**,R1</sup>           | C <sub>5</sub> H <sub>11</sub> NO <sub>2</sub> S                              | 32.7       | 150.0588     | 150.0583        | -0.5               | -3.2               |
| <b>43</b> | Glutamine (Gln) <sup>**</sup>                 | C <sub>5</sub> H <sub>10</sub> N <sub>2</sub> O <sub>3</sub>                  | 32.8       | 147.0769     | 147.0764        | -0.5               | -3.3               |
| <b>44</b> | 2-Aminoadate <sup>**,R2</sup>                 | C <sub>6</sub> H <sub>11</sub> NO <sub>4</sub>                                | 32.9       | 162.0767     | 162.0761        | -0.6               | -3.8               |
| <b>45</b> | Acetylhomoserine <sup>†,R2</sup>              | C <sub>6</sub> H <sub>11</sub> NO <sub>4</sub>                                | 32.9       | 162.0767     | 162.0761        | -0.6               | -3.8               |
| <b>46</b> | Citrulline (Cit) <sup>**,R1</sup>             | C <sub>6</sub> H <sub>13</sub> N <sub>3</sub> O <sub>3</sub>                  | 33.1       | 176.1027     | 176.1030        | 0.3                | 1.5                |
| <b>47</b> | Homocitrulline <sup>**,R1</sup>               | C <sub>7</sub> H <sub>15</sub> N <sub>3</sub> O <sub>3</sub>                  | 33.2       | 190.1178     | 190.1186        | 0.8                | 4.3                |
| <b>48</b> | Glutamic acid (Glu) <sup>**</sup>             | C <sub>5</sub> H <sub>9</sub> NO <sub>4</sub>                                 | 33.2       | 148.0610     | 148.0604        | -0.6               | -3.8               |
| <b>49</b> | Phenylalanine (Phe) <sup>**,R1</sup>          | C <sub>9</sub> H <sub>11</sub> NO <sub>2</sub>                                | 33.7       | 166.0867     | 166.0863        | -0.4               | -2.7               |
| <b>50</b> | Acetyllysine <sup>†,R2</sup>                  | C <sub>8</sub> H <sub>16</sub> N <sub>2</sub> O <sub>3</sub>                  | 34.0       | 189.1219     | 189.1234        | 1.5                | 7.8                |
| <b>51</b> | Tyrosine (Tyr) <sup>*,**,R1</sup>             | C <sub>9</sub> H <sub>11</sub> NO <sub>3</sub>                                | 34.1       | 182.0813     | 182.0812        | -0.1               | -0.7               |
| <b>52</b> | Hypoxanthine (HPX) <sup>**</sup>              | C <sub>5</sub> H <sub>4</sub> N <sub>4</sub> O                                | 34.3       | 137.0461     | 137.0458        | -0.3               | -2.3               |
| <b>53</b> | Proline (Pro) <sup>*,**,R1</sup>              | C <sub>5</sub> H <sub>9</sub> NO <sub>2</sub>                                 | 34.6       | 116.0707     | 116.0706        | -0.1               | -0.8               |
| <b>54</b> | Ser-Val (SV) <sup>†,R2</sup>                  | C <sub>8</sub> H <sub>16</sub> N <sub>2</sub> O <sub>4</sub>                  | 34.9       | 205.1181     | 205.1183        | 0.2                | 0.9                |
| <b>55</b> | Cysteine <sup>*,**,R2</sup>                   | C <sub>3</sub> H <sub>7</sub> NO <sub>2</sub> S                               | 35.8       | 122.0269     | 122.0270        | 0.1                | 1.0                |
| <b>56</b> | Aspartic acid <sup>*,**</sup>                 | C <sub>4</sub> H <sub>7</sub> NO <sub>4</sub>                                 | 36.0       | 134.0451     | 134.0448        | -0.3               | -2.4               |
| <b>57</b> | Glycine betaine (GB) <sup>*,‡,R1</sup>        | C <sub>5</sub> H <sub>11</sub> NO <sub>2</sub>                                | 36.6       | 118.0864     | 118.0863        | -0.1               | -1.2               |
| <b>58</b> | Glutathione, oxidized (GSSG) <sup>**,R1</sup> | C <sub>20</sub> H <sub>32</sub> N <sub>6</sub> O <sub>12</sub> S <sub>2</sub> | 37.2       | 307.0826     | 307.0833        | 0.7                | 2.1                |
| <b>59</b> | Hydroxyproline (Hyp) <sup>**</sup>            | C <sub>5</sub> H <sub>9</sub> NO <sub>3</sub>                                 | 38.3       | 132.0660     | 132.0655        | -0.5               | -3.6               |
| <b>60</b> | Glutathione (GSH) <sup>*,**,R1</sup>          | C <sub>10</sub> H <sub>17</sub> N <sub>3</sub> O <sub>6</sub> S               | 40.0       | 308.0908     | 308.0911        | 0.3                | 0.9                |

**Table S3.** Metabolites identified by anionic microprobe CE-ESI-MS.

| ID        | Metabolite (Abbrev)                      | Formula                                                        | Time (min) | <i>m/z</i> measured | <i>m/z</i> theoretical | $\Delta m/z$ (mDa) | $\Delta m/z$ (ppm) |
|-----------|------------------------------------------|----------------------------------------------------------------|------------|---------------------|------------------------|--------------------|--------------------|
| <u>1</u>  | Arginine (Arg)**                         | C <sub>6</sub> H <sub>14</sub> N <sub>4</sub> O <sub>2</sub>   | 11.3       | 173.1027            | 173.1033               | 0.6                | 3.5                |
| <u>2</u>  | Lysine (Lys)**                           | C <sub>6</sub> H <sub>14</sub> N <sub>2</sub> O <sub>2</sub>   | 13.9       | 145.0958            | 145.0971               | 1.3                | 9.2                |
| <u>3</u>  | Glutamine (Gln)**                        | C <sub>5</sub> H <sub>10</sub> N <sub>2</sub> O <sub>3</sub>   | 15.1       | 145.0605            | 145.0608               | 0.3                | 2.3                |
| <u>4</u>  | Glucose**                                | C <sub>6</sub> H <sub>12</sub> O <sub>6</sub>                  | 16.4       | 179.0555            | 179.0550               | -0.5               | -2.8               |
| <u>5</u>  | Asparagine (Asn)**                       | C <sub>4</sub> H <sub>8</sub> N <sub>2</sub> O <sub>3</sub>    | 17.3       | 131.0461            | 131.0451               | -1.0               | -7.6               |
| <u>6</u>  | Creatine (CR)**                          | C <sub>4</sub> H <sub>9</sub> N <sub>3</sub> O <sub>2</sub>    | 17.6       | 130.0613            | 130.0609               | -0.4               | -3.1               |
| <u>7</u>  | Phenethoxybenzamid - oxopentanoic acid** | C <sub>19</sub> H <sub>19</sub> N <sub>3</sub> O <sub>7</sub>  | 19.9       | 400.1150            | 400.1139               | -1.1               | -2.8               |
| <u>8</u>  | Phosphorylcholine**                      | C <sub>4</sub> H <sub>12</sub> NO <sub>4</sub> P               | 20.5       | 168.0413            | 168.042                | 0.7                | 4.3                |
| <u>9</u>  | Pyridoxal**                              | C <sub>8</sub> H <sub>9</sub> NO <sub>3</sub>                  | 20.8       | 166.0519            | 166.0498               | -2.1               | -12.6              |
| <u>10</u> | Aspartic acid (Asp)**                    | C <sub>4</sub> H <sub>7</sub> NO <sub>4</sub>                  | 24.8       | 132.0287            | 132.0291               | 0.4                | 3.3                |
| <u>11</u> | Phosphoylethanolamine**                  | C <sub>2</sub> H <sub>8</sub> NO <sub>4</sub> P                | 28.2       | 140.0115            | 140.0107               | -0.8               | -5.7               |
| <u>12</u> | Glyceric acid**                          | C <sub>3</sub> H <sub>6</sub> O <sub>4</sub>                   | 31.3       | 105.0191            | 105.0182               | -0.9               | -8.6               |
| <u>13</u> | Guanine**                                | C <sub>5</sub> H <sub>5</sub> N <sub>5</sub> O                 | 31.9       | 150.0415            | 150.041                | -0.5               | -3.3               |
| <u>14</u> | Pantothenic acid**                       | C <sub>9</sub> H <sub>17</sub> NO <sub>5</sub>                 | 32.0       | 218.1044            | 218.1023               | -2.1               | -9.6               |
| <u>15</u> | Cytidine phosphate (CMP)**               | C <sub>9</sub> H <sub>14</sub> N <sub>3</sub> O <sub>8</sub> P | 38.4       | 322.0462            | 322.0434               | -2.8               | -8.7               |
| <u>16</u> | Adenine**                                | C <sub>5</sub> H <sub>5</sub> N <sub>5</sub>                   | 38.7       | 134.0482            | 134.0461               | -2.1               | -15.7              |
| <u>17</u> | Pyridoxic acid (PHOS)**                  | C <sub>8</sub> H <sub>9</sub> NO <sub>4</sub>                  | 39.7       | 182.0472            | 182.0447               | -2.5               | -13.7              |
| <u>18</u> | Glutamate (Glu)**                        | C <sub>5</sub> H <sub>9</sub> NO <sub>4</sub>                  | 40.4       | 146.0472            | 146.0456               | -1.6               | -11.0              |
| <u>19</u> | Uridine monophosphate**                  | C <sub>9</sub> H <sub>13</sub> N <sub>2</sub> O <sub>9</sub> P | 40.9       | 323.0301            | 323.0274               | -2.7               | -8.4               |
| <u>20</u> | Hypoxanthine (HPX)**                     | C <sub>5</sub> H <sub>4</sub> N <sub>4</sub> O                 | 45.4       | 135.0311            | 135.0301               | -1.0               | -7.4               |
| <u>21</u> | Phosphocreatine**                        | C <sub>4</sub> H <sub>10</sub> N <sub>3</sub> O <sub>5</sub> P | 53.4       | 210.0276            | 210.0274               | -0.2               | -1.0               |
| <u>22</u> | Alanine (Ala)**                          | C <sub>3</sub> H <sub>7</sub> NO <sub>2</sub>                  | 53.6       | 88.0405             | 88.0393                | -1.2               | -13.6              |
| <u>23</u> | Guanidinopropanoate**                    | C <sub>4</sub> H <sub>9</sub> N <sub>3</sub> O <sub>2</sub>    | 53.9       | 130.0613            | 130.0611               | -0.2               | -1.5               |
| <u>24</u> | Glucose phosphate**                      | C <sub>6</sub> H <sub>13</sub> O <sub>9</sub> P                | 62.0       | 259.0234            | 259.0214               | -2.0               | -7.7               |

**Note:** Asterisk (\*) signifies identification based on migration-time comparison to chemical standards. Double asterisk (\*\*) denotes identification by tandem mass spectrometry experiments on related standards or comparison to data available in Metlin (<http://metlin.scripps.edu>), MzCloud (<http://mzcloud.org>), or HMDB (<http://hmdb.ca>). Dagger (†) indicates that tandem mass spectrum agrees with molecular fragmentation predicted in Mass Frontier 7.0 (Thermo Fisher). Double dagger (‡) indicates mass-match in Metlin. R1 indicates previous metabolite identification based on reference<sup>1</sup> and R2 indicates identification based on reference<sup>2</sup>.

**Table S4.** Selected molecular features detected by anionic analysis of a single V1 cell.

| <b>Identifier</b> | <b><i>m/z</i></b> | <b><i>t<sub>m</sub></i> (min)</b> |
|-------------------|-------------------|-----------------------------------|
| <b><u>1</u></b>   | 204.0888          | 17.5                              |
| <b><u>2</u></b>   | 214.0492          | 19.1                              |
| <b><u>3</u></b>   | 124.0068          | 19.1                              |
| <b><u>4</u></b>   | 173.1060          | 22.7                              |
| <b><u>5</u></b>   | 136.9618          | 26.8                              |
| <b><u>6</u></b>   | 308.0950          | 29.2                              |
| <b><u>7</u></b>   | 254.1767          | 29.5                              |
| <b><u>8</u></b>   | 257.1761          | 29.7                              |
| <b><u>9</u></b>   | 243.0813          | 32.4                              |
| <b><u>10</u></b>  | 216.0885          | 32.9                              |
| <b><u>11</u></b>  | 186.1146          | 33.2                              |
| <b><u>12</u></b>  | 190.0551          | 35.2                              |
| <b><u>13</u></b>  | 181.0517          | 36.5                              |
| <b><u>14</u></b>  | 149.0470          | 40.5                              |
| <b><u>15</u></b>  | 176.9354          | 40.9                              |
| <b><u>16</u></b>  | 117.0565          | 44.4                              |

## References

1. R. M. Onjiko, S. E. Morris, S. A. Moody and P. Nemes, *Analyst*, 2016, **141**, 3648-3656.
2. R. M. Onjiko, E. P. Portero, S. A. Moody and P. Nemes, *Anal. Chem.*, 2017, **89**, 7069-7076.
